# Supplementary material for: Sexual behavior and sexually transmitted infection in the elderly population of South Korea
Source: PubMed Central journal article supplement — Investig Clin Urol. 2019 Apr 1;60(3):202–9. doi: 10.4111/icu.2019.60.3.202 (PMC6495036; doi:10.4111/icu.2019.60.3.202), 2019-04-01
Supplement: icu-60-202-s001.pdf [file icu-60-202-s001.pdf]

**Supplementary material.** Survey on sexual behavior and awareness on sexually transmitted disease

## A. Questions regarding sexual behavior

1. How frequent did you have sexual intercourse during the last year?

- 1) 1–2 times per 1 month
- 2) 1–2 times per 3 months
- 3) 1–2 times per 6 months
- 4) 1–2 times per 1 year
- 5) None

2. What was the number of sexual partner during the last year?

- 1) 1
- 2) 2
- 3) More than 3
- 4) None

3. What was the type of sexual partner during the last year? Pick all.

- 1) Spouse
- 2) Couple
- 3) Prostitution
- 4) Etc.

4. Did you use condoms during sexual intercourse during the last year?

- 1) Almost always
- 2) More than half times
- 3) Less than half times
- 4) Never used

### For men only

5. Do you think that you have decreased sexual function such as erectile dysfunction?

- 1) Severe
- 2) Moderate
- 3) Little
- 4) None

6. Do you use phosphodiesterase inhibitors (like Viagra) when you have sexual intercourse?

- 1) Yes
- 2) No

7. How much do you think phosphodiesterase inhibitors (like Viagra) contribute to your sexual life?

- 1) Very much
- 2) Moderate
- 3) Little
- 4) None

## **B. Questions regarding sexually transmitted diseases (STDs)**

8. Were you ever infected with sexually transmitted diseases?

- 1) Yes
- 2) No

If yes, when were you infected?

- 1) Over 10 years ago
- 2) Under 10 years ago
- 3) Not sure

9. What type of sexually transmitted diseases were you infected?

- 1) Urethritis
- 2) Gonorrhoea
- 3) Syphilis
- 4) Herpes
- 5) Don't know

10. What type of sexual partner were you infected from?

- 1) Spouse
- 2) Friend
- 3) Prostitute
- 4) Not sure

11. Where did you get treatment for sexually transmitted diseases?

- 1) Untreated
- 2) Hospital
- 3) Community health center
- 4) Etc.

## **C. Questions regarding sexual health education**

12. Did you have any experience with sexual health education?

- 1) Yes
- 2) No

Are you willing to receive sexual health education for elderly?

- 1) Yes
- 2) No

13. What type of institution do you prefer to receive sexual health education?

- 1) District office
- 2) Welfare center
- 3) Counseling center
- 4) Religious institution
- 5) Public health center
- 6) Professional organization
- 7) Etc.

14. What type of personnel do you prefer to receive sexual health education?

- 1) Doctor/nurse
- 2) Counselor
- 3) Family
- 4) Friend
- 5) Etc.
