# Supplementary material for: Sexual behavior and sexually transmitted infection in the elderly population of South Korea
Source: PubMed Central journal article supplement — Investig Clin Urol. 2019 Apr 1;60(3):202–9. doi: 10.4111/icu.2019.60.3.202 (PMC6495036; doi:10.4111/icu.2019.60.3.202), 2019-04-01
Supplement: icu-60-202-s002.pdf [file icu-60-202-s002.pdf]

**Supplementary Table 1.** Frequency of sexual intercourse

|         | Low-risk group (n=204) |                    |                    |                   |           | High-risk group (n=133) |                    |                    |                   |           |
|---------|------------------------|--------------------|--------------------|-------------------|-----------|-------------------------|--------------------|--------------------|-------------------|-----------|
|         | 1–2 times<br>/1 mo     | 1–2 times<br>/3 mo | 1–2 times<br>/6 mo | 1–2 times<br>/1 y | None      | 1–2 times<br>/1 mo      | 1–2 times<br>/3 mo | 1–2 times<br>/6 mo | 1–2 times<br>/1 y | None      |
| Age (y) |                        |                    |                    |                   |           |                         |                    |                    |                   |           |
| 60–64   | 10 (4.9)               | 1 (0.5)            | 0 (0.0)            | 0 (0.0)           | 4 (2.0)   | 1 (0.8)                 | 0 (0.0)            | 0 (0.0)            | 0 (0.0)           | 0 (0.0)   |
| 65–70   | 23 (11.3)              | 6 (2.9)            | 3 (1.5)            | 5 (2.5)           | 19 (9.3)  | 7 (5.3)                 | 2 (1.5)            | 0 (0.0)            | 2 (1.5)           | 10 (7.5)  |
| 71–80   | 27 (13.2)              | 6 (2.9)            | 2 (1.0)            | 2 (1.0)           | 68 (33.3) | 21 (15.8)               | 5 (3.8)            | 4 (3.0)            | 5 (3.8)           | 45 (33.8) |
| 81–90   | 1 (0.5)                | 0 (0.0)            | 0 (0.0)            | 0 (0.0)           | 23 (11.3) | 6 (4.5)                 | 1 (0.8)            | 0 (0.0)            | 0 (0.0)           | 21 (15.8) |
| ≥91     | 0 (0.0)                | 0 (0.0)            | 0 (0.0)            | 0 (0.0)           | 4 (2.0)   | 0 (0.0)                 | 0 (0.0)            | 0 (0.0)            | 0 (0.0)           | 3 (2.3)   |
| Sex     |                        |                    |                    |                   |           |                         |                    |                    |                   |           |
| Male    | 35 (17.2)              | 11 (5.4)           | 2 (1.0)            | 5 (2.5)           | 44 (21.6) | 34 (25.6)               | 8 (6.0)            | 4 (3.0)            | 6 (4.5)           | 65 (48.9) |
| Female  | 26 (12.7)              | 2 (1.0)            | 3 (1.5)            | 2 (1.0)           | 74 (36.3) | 1 (0.8)                 | 0 (0.0)            | 0 (0.0)            | 1 (0.8)           | 14 (10.5) |

Values are presented as number (%).
