# Supplementary material for: Sexual behavior and sexually transmitted infection in the elderly population of South Korea
Source: PubMed Central journal article supplement — Investig Clin Urol. 2019 Apr 1;60(3):202–9. doi: 10.4111/icu.2019.60.3.202 (PMC6495036; doi:10.4111/icu.2019.60.3.202), 2019-04-01
Supplement: icu-60-202-s003.pdf [file icu-60-202-s003.pdf]

**Supplementary Table 2.** Number of sexual partners

|         | Low-risk group (n=204) |         |         |           | High-risk group (n=133) |         |         |           |
|---------|------------------------|---------|---------|-----------|-------------------------|---------|---------|-----------|
|         | 1                      | 2       | Over 3  | None      | 1                       | 2       | Over 3  | None      |
| Age (y) |                        |         |         |           |                         |         |         |           |
| 60–64   | 10 (4.9)               | 1 (0.5) | 0 (0.0) | 4 (2.0)   | 1 (0.8)                 | 0 (0.0) | 0 (0.0) | 0 (0.0)   |
| 65–70   | 36 (17.6)              | 1 (0.5) | 0 (0.0) | 19 (9.3)  | 9 (6.8)                 | 0 (0.0) | 2 (1.5) | 10 (7.5)  |
| 71–80   | 35 (17.2)              | 2 (1.0) | 1 (0.5) | 67 (32.8) | 29 (21.8)               | 2 (1.5) | 3 (2.3) | 46 (34.6) |
| 81–90   | 0 (0.0)                | 0 (0.0) | 0 (0.0) | 24 (11.8) | 6 (4.5)                 | 0 (0.0) | 1 (0.8) | 21 (15.8) |
| ≥91     | 0 (0.0)                | 0 (0.0) | 0 (0.0) | 4 (2.0)   | 0 (0.0)                 | 0 (0.0) | 0 (0.0) | 3 (2.3)   |
| Sex     |                        |         |         |           |                         |         |         |           |
| Male    | 48 (23.5)              | 4 (2.0) | 1 (0.5) | 44 (21.6) | 42 (31.6)               | 2 (1.5) | 6 (4.5) | 66 (49.6) |
| Female  | 33 (16.2)              | 0 (0.0) | 0 (0.0) | 70 (34.3) | 2 (1.5)                 | 0 (0.0) | 0 (0.0) | 14 (10.5) |

Values are presented as number (%).
