# Supplementary material for: Sexual behavior and sexually transmitted infection in the elderly population of South Korea
Source: PubMed Central journal article supplement — Investig Clin Urol. 2019 Apr 1;60(3):202–9. doi: 10.4111/icu.2019.60.3.202 (PMC6495036; doi:10.4111/icu.2019.60.3.202), 2019-04-01
Supplement: icu-60-202-s004.pdf [file icu-60-202-s004.pdf]

**Supplementary Table 3.** Types of sexual partner

|         | Low-risk group (n=88) |         |              |         | High-risk group (n=58) |           |              |         |
|---------|-----------------------|---------|--------------|---------|------------------------|-----------|--------------|---------|
|         | Spouse                | Couple  | Prostitution | Etc.    | Spouse                 | Couple    | Prostitution | Etc.    |
| Age (y) |                       |         |              |         |                        |           |              |         |
| 60–64   | 10 (11.4)             | 1 (1.1) | 0 (0.0)      | 0 (0.0) | 1 (1.7)                | 0 (0.0)   | 0 (0.0)      | 0 (0.0) |
| 65–70   | 34 (38.6)             | 3 (3.4) | 0 (0.0)      | 0 (0.0) | 8 (13.8)               | 4 (6.9)   | 1 (1.7)      | 0 (0.0) |
| 71–80   | 36 (40.9)             | 3 (3.4) | 1 (1.1)      | 0 (0.0) | 28 (48.3)              | 5 (8.6)   | 3 (5.2)      | 1 (1.7) |
| 81–90   | 0 (0.0)               | 0 (0.0) | 0 (0.0)      | 0 (0.0) | 3 (5.2)                | 4 (6.9)   | 0 (0.0)      | 0 (0.0) |
| ≥91     | 0 (0.0)               | 0 (0.0) | 0 (0.0)      | 0 (0.0) | 0 (0.0)                | 0 (0.0)   | 0 (0.0)      | 0 (0.0) |
| Sex     |                       |         |              |         |                        |           |              |         |
| Male    | 47 (53.4)             | 7 (8.0) | 1 (1.1)      | 0 (0.0) | 39 (67.2)              | 12 (20.7) | 4 (6.9)      | 1 (1.7) |
| Female  | 33 (37.5)             | 0 (0.0) | 0 (0.0)      | 0 (0.0) | 1 (1.7)                | 1 (1.7)   | 0 (0.0)      | 0 (0.0) |

Values are presented as number (%).
