# Supplementary material for: Sexual behavior and sexually transmitted infection in the elderly population of South Korea
Source: PubMed Central journal article supplement — Investig Clin Urol. 2019 Apr 1;60(3):202–9. doi: 10.4111/icu.2019.60.3.202 (PMC6495036; doi:10.4111/icu.2019.60.3.202), 2019-04-01
Supplement: icu-60-202-s005.pdf [file icu-60-202-s005.pdf]

**Supplementary Table 4.** Condom use during sexual intercourse

|         | Low-risk group (n=85) |                      |                      |            | High-risk group (n=54) |                      |                      |            |
|---------|-----------------------|----------------------|----------------------|------------|------------------------|----------------------|----------------------|------------|
|         | Almost always         | More than half times | Less than half times | Never used | Almost always          | More than half times | Less than half times | Never used |
| Age (y) |                       |                      |                      |            |                        |                      |                      |            |
| 60–64   | 0 (0.0)               | 0 (0.0)              | 2 (2.4)              | 10 (11.8)  | 0 (0.0)                | 0 (0.0)              | 0 (0.0)              | 1 (1.9)    |
| 65–70   | 0 (0.0)               | 0 (0.0)              | 0 (0.0)              | 35 (41.2)  | 1 (1.9)                | 0 (0.0)              | 1 (1.9)              | 9 (16.7)   |
| 71–80   | 1 (1.2)               | 0 (0.0)              | 0 (0.0)              | 33 (38.8)  | 2 (3.7)                | 0 (0.0)              | 1 (1.9)              | 32 (59.3)  |
| 81–90   | 0 (0.0)               | 0 (0.0)              | 0 (0.0)              | 1 (1.2)    | 2 (3.7)                | 0 (0.0)              | 0 (0.0)              | 5 (9.3)    |
| ≥91     | 0 (0.0)               | 0 (0.0)              | 0 (0.0)              | 0 (0.0)    | 0 (0.0)                | 0 (0.0)              | 0 (0.0)              | 0 (0.0)    |
| Sex     |                       |                      |                      |            |                        |                      |                      |            |
| Male    | 1 (1.2)               | 0 (0.0)              | 1 (1.2)              | 50 (58.8)  | 5 (9.3)                | 0 (0.0)              | 2 (3.7)              | 45 (83.3)  |
| Female  | 0 (0.0)               | 0 (0.0)              | 0 (0.0)              | 29 (34.1)  | 0 (0.0)                | 0 (0.0)              | 0 (0.0)              | 2 (3.7)    |

Values are presented as number (%).
