# Supplementary material for: Sexual behavior and sexually transmitted infection in the elderly population of South Korea
Source: PubMed Central journal article supplement — Investig Clin Urol. 2019 Apr 1;60(3):202–9. doi: 10.4111/icu.2019.60.3.202 (PMC6495036; doi:10.4111/icu.2019.60.3.202), 2019-04-01
Supplement: icu-60-202-s006.pdf [file icu-60-202-s006.pdf]

**Supplementary Table 5.** Presence of erectile dysfunction

|         | Low-risk group (n=97) |           |           |         | High-risk group (n=111) |           |           |         |
|---------|-----------------------|-----------|-----------|---------|-------------------------|-----------|-----------|---------|
|         | Severe                | Moderate  | Little    | None    | Severe                  | Moderate  | Little    | None    |
| Age (y) |                       |           |           |         |                         |           |           |         |
| 60–64   | 1 (1.0)               | 2 (2.1)   | 0 (0.0)   | 0 (0.0) | 0 (0.0)                 | 0 (0.0)   | 0 (0.0)   | 0 (0.0) |
| 65–70   | 19 (19.6)             | 18 (18.6) | 4 (4.1)   | 2 (2.1) | 4 (3.6)                 | 5 (4.5)   | 7 (6.3)   | 0 (0.0) |
| 71–80   | 4 (4.1)               | 22 (22.7) | 10 (10.3) | 4 (4.1) | 31 (27.9)               | 25 (22.5) | 11 (9.9)  | 1 (0.9) |
| 81–90   | 5 (5.2)               | 2 (2.1)   | 1 (1.0)   | 1 (1.0) | 15 (13.5)               | 3 (2.7)   | 3 (2.7)   | 1 (0.9) |
| ≥91     | 1 (1.0)               | 1 (1.0)   | 0 (0.0)   | 0 (0.0) | 3 (2.7)                 | 0 (0.0)   | 0 (0.0)   | 0 (0.0) |
| Sex     |                       |           |           |         |                         |           |           |         |
| Male    | 30 (30.9)             | 45 (46.4) | 15 (15.5) | 7 (7.2) | 53 (47.7)               | 33 (29.7) | 21 (18.9) | 2 (1.8) |

Values are presented as number (%).
