# Supplementary material for: Sexual behavior and sexually transmitted infection in the elderly population of South Korea
Source: PubMed Central journal article supplement — Investig Clin Urol. 2019 Apr 1;60(3):202–9. doi: 10.4111/icu.2019.60.3.202 (PMC6495036; doi:10.4111/icu.2019.60.3.202), 2019-04-01
Supplement: icu-60-202-s007.pdf [file icu-60-202-s007.pdf]

**Supplementary Table 6.** Use of phosphodiesterase-5 inhibitors

|         | Low-risk group (n=97) |           | High-risk group (n=117) |           |
|---------|-----------------------|-----------|-------------------------|-----------|
|         | Yes                   | No        | Yes                     | No        |
| Age (y) |                       |           |                         |           |
| 60–64   | 1 (1.0)               | 2 (2.1)   | 0 (0.0)                 | 0 (0.0)   |
| 65–70   | 9 (9.3)               | 16 (16.5) | 23 (19.7)               | 13 (11.1) |
| 71–80   | 15 (15.5)             | 42 (43.3) | 6 (5.1)                 | 44 (37.6) |
| 81–90   | 1 (1.0)               | 9 (9.3)   | 2 (1.7)                 | 19 (16.2) |
| ≥91     | 0 (0.0)               | 2 (2.1)   | 0 (0.0)                 | 2 (1.7)   |
| Sex     |                       |           |                         |           |
| Male    | 23 (23.7)             | 71 (73.2) | 32 (27.4)               | 78 (66.7) |

Values are presented as number (%).
