# Supplementary material for: Sexual behavior and sexually transmitted infection in the elderly population of South Korea
Source: PubMed Central journal article supplement — Investig Clin Urol. 2019 Apr 1;60(3):202–9. doi: 10.4111/icu.2019.60.3.202 (PMC6495036; doi:10.4111/icu.2019.60.3.202), 2019-04-01
Supplement: icu-60-202-s008.pdf [file icu-60-202-s008.pdf]

**Supplementary Table 7.** Contribution of phosphodiesterase-5 inhibitors to sexual life

|         | Low-risk group (n=97) |           |           |           | High-risk group (n=117) |           |           |         |
|---------|-----------------------|-----------|-----------|-----------|-------------------------|-----------|-----------|---------|
|         | Very much             | Moderate  | Little    | None      | Very much               | Moderate  | Little    | None    |
| Age (y) |                       |           |           |           |                         |           |           |         |
| 60–64   | 1 (1.0)               | 0 (0.0)   | 2 (2.1)   | 0 (0.0)   | 0 (0.0)                 | 0 (0.0)   | 0 (0.0)   | 0 (0.0) |
| 65–70   | 3 (3.1)               | 8 (8.2)   | 9 (9.3)   | 4 (4.1)   | 1 (0.9)                 | 6 (5.1)   | 4 (3.4)   | 0 (0.0) |
| 71–80   | 6 (6.2)               | 11 (11.3) | 24 (24.7) | 13 (13.4) | 3 (2.6)                 | 19 (16.2) | 17 (14.5) | 2 (1.7) |
| 81–90   | 0 (0.0)               | 1 (1.0)   | 2 (2.1)   | 5 (5.2)   | 0 (0.0)                 | 5 (4.3)   | 3 (2.6)   | 1 (0.9) |
| ≥91     | 0 (0.0)               | 0 (0.0)   | 1 (1.0)   | 1 (1.0)   | 0 (0.0)                 | 1 (0.9)   | 1 (0.9)   | 0 (0.0) |
| Sex     |                       |           |           |           |                         |           |           |         |
| Male    | 10 (10.3)             | 20 (20.6) | 38 (39.2) | 23 (23.7) | 4 (3.4)                 | 31 (26.5) | 25 (21.4) | 3 (2.6) |

Values are presented as number (%).
