# Supplementary material for: Sexual behavior and sexually transmitted infection in the elderly population of South Korea
Source: PubMed Central journal article supplement — Investig Clin Urol. 2019 Apr 1;60(3):202–9. doi: 10.4111/icu.2019.60.3.202 (PMC6495036; doi:10.4111/icu.2019.60.3.202), 2019-04-01
Supplement: icu-60-202-s009.pdf [file icu-60-202-s009.pdf]

**Supplementary Table 8.** History of infection with sexually transmitted disease and time of infection

|         | Low-risk group (n=204) |                   |         |          | High-risk group (n=133) |                   |         |          |
|---------|------------------------|-------------------|---------|----------|-------------------------|-------------------|---------|----------|
|         | Infected               | Time of infection |         |          | Infected                | Time of infection |         |          |
|         |                        | >10 y             | ≤10 y   | Not sure |                         | >10 y             | ≤10 y   | Not sure |
| Age (y) |                        |                   |         |          |                         |                   |         |          |
| 60–64   | 0 (0.0)                | 0 (0.0)           | 0 (0.0) | 0 (0.0)  | 0 (0.0)                 | 0 (0.0)           | 0 (0.0) | 0 (0.0)  |
| 65–70   | 7 (3.4)                | 7 (19.4)          | 0 (0.0) | 0 (0.0)  | 8 (6.0)                 | 7 (19.4)          | 0 (0.0) | 1 (2.8)  |
| 71–80   | 24 (11.8)              | 24 (66.7)         | 0 (0.0) | 0 (0.0)  | 21 (15.8)               | 18 (50.0)         | 2 (5.6) | 0 (0.0)  |
| 81–90   | 5 (2.5)                | 5 (13.9)          | 0 (0.0) | 0 (0.0)  | 7 (5.3)                 | 6 (16.7)          | 1 (2.8) | 1 (2.8)  |
| ≥91     | 0 (0.0)                | 0 (0.0)           | 0 (0.0) | 0 (0.0)  | 0 (0.0)                 | 0 (0.0)           | 0 (0.0) | 0 (0.0)  |
| Sex     |                        |                   |         |          |                         |                   |         |          |
| Male    | 30 (14.7)              | 30 (83.3)         | 0 (0.0) | 0 (0.0)  | 32 (24.1)               | 27 (75.0)         | 3 (8.3) | 2 (5.6)  |
| Female  | 6 (2.9)                | 6 (16.7)          | 0 (0.0) | 0 (0.0)  | 4 (3.0)                 | 4 (11.1)          | 0 (0.0) | 0 (0.0)  |

Values are presented as number (%).
