# Supplementary material for: Sexual behavior and sexually transmitted infection in the elderly population of South Korea
Source: PubMed Central journal article supplement — Investig Clin Urol. 2019 Apr 1;60(3):202–9. doi: 10.4111/icu.2019.60.3.202 (PMC6495036; doi:10.4111/icu.2019.60.3.202), 2019-04-01
Supplement: icu-60-202-s010.pdf [file icu-60-202-s010.pdf]

**Supplementary Table 9.** Type of sexually transmitted disease

|         | Low-risk group (n=36) |           |          |         | High-risk group (n=36) |           |          |         |
|---------|-----------------------|-----------|----------|---------|------------------------|-----------|----------|---------|
|         | Urethritis            | Gonorrhea | Syphilis | Herpes  | Urethritis             | Gonorrhea | Syphilis | Herpes  |
| Age (y) |                       |           |          |         |                        |           |          |         |
| 60–64   | 0 (0.0)               | 0 (0.0)   | 0 (0.0)  | 0 (0.0) | 0 (0.0)                | 0 (0.0)   | 0 (0.0)  | 0 (0.0) |
| 65–70   | 1 (2.8)               | 5 (13.9)  | 0 (0.0)  | 1 (2.8) | 1 (2.8)                | 5 (13.9)  | 0 (0.0)  | 1 (2.8) |
| 71–80   | 1 (2.8)               | 16 (44.4) | 2 (5.6)  | 1 (2.8) | 3 (8.3)                | 16 (44.4) | 0 (0.0)  | 0 (0.0) |
| 81–90   | 0 (0.0)               | 3 (8.3)   | 0 (0.0)  | 0 (0.0) | 2 (5.6)                | 4 (11.1)  | 0 (0.0)  | 0 (0.0) |
| ≥91     | 0 (0.0)               | 0 (0.0)   | 0 (0.0)  | 0 (0.0) | 0 (0.0)                | 0 (0.0)   | 0 (0.0)  | 0 (0.0) |
| Sex     |                       |           |          |         |                        |           |          |         |
| Male    | 2 (5.6)               | 21 (58.3) | 2 (5.6)  | 2 (5.6) | 5 (13.9)               | 26 (72.2) | 0 (0.0)  | 0 (0.0) |
| Female  | 0 (0.0)               | 3 (8.3)   | 0 (0.0)  | 0 (0.0) | 1 (2.8)                | 1 (2.8)   | 0 (0.0)  | 1 (2.8) |

Values are presented as number (%).
