# Supplementary material for: Sexual behavior and sexually transmitted infection in the elderly population of South Korea
Source: PubMed Central journal article supplement — Investig Clin Urol. 2019 Apr 1;60(3):202–9. doi: 10.4111/icu.2019.60.3.202 (PMC6495036; doi:10.4111/icu.2019.60.3.202), 2019-04-01
Supplement: icu-60-202-s011.pdf [file icu-60-202-s011.pdf]

**Supplementary Table 10.** Types of sexual partner that sexually transmitted disease was infected

|         | Low-risk group (n=36) |          |              |          | High-risk group (n=36) |          |              |          |
|---------|-----------------------|----------|--------------|----------|------------------------|----------|--------------|----------|
|         | Spouse                | Friend   | Prostitution | Not sure | Spouse                 | Friend   | Prostitution | Not sure |
| Age (y) |                       |          |              |          |                        |          |              |          |
| 60–64   | 0 (0.0)               | 0 (0.0)  | 0 (0.0)      | 0 (0.0)  | 0 (0.0)                | 0 (0.0)  | 0 (0.0)      | 0 (0.0)  |
| 65–70   | 1 (2.8)               | 1 (2.8)  | 3 (8.3)      | 2 (5.6)  | 2 (5.6)                | 2 (5.6)  | 4 (11.1)     | 0 (0.0)  |
| 71–80   | 3 (8.3)               | 5 (13.9) | 14 (38.9)    | 1 (2.8)  | 0 (0.0)                | 4 (11.1) | 13 (36.1)    | 4 (11.1) |
| 81–90   | 2 (5.6)               | 0 (0.0)  | 2 (5.6)      | 0 (0.0)  | 0 (0.0)                | 2 (5.6)  | 3 (8.3)      | 1 (2.8)  |
| ≥91     | 0 (0.0)               | 0 (0.0)  | 0 (0.0)      | 0 (0.0)  | 0 (0.0)                | 0 (0.0)  | 0 (0.0)      | 0 (0.0)  |
| Sex     |                       |          |              |          |                        |          |              |          |
| Male    | 2 (5.6)               | 6 (16.7) | 19 (52.8)    | 3 (8.3)  | 0 (0.0)                | 6 (16.7) | 20 (55.6)    | 5 (13.9) |
| Female  | 4 (11.1)              | 0 (0.0)  | 0 (0.0)      | 1 (2.8)  | 2 (5.6)                | 2 (5.6)  | 0 (0.0)      | 0 (0.0)  |

Values are presented as number (%).
