# Supplementary material for: Sexual behavior and sexually transmitted infection in the elderly population of South Korea
Source: PubMed Central journal article supplement — Investig Clin Urol. 2019 Apr 1;60(3):202–9. doi: 10.4111/icu.2019.60.3.202 (PMC6495036; doi:10.4111/icu.2019.60.3.202), 2019-04-01
Supplement: icu-60-202-s013.pdf [file icu-60-202-s013.pdf]

**Supplementary Table 12.** Experience with and intention to receive sexual health education

|         | Low-risk group (n=204)                  |           |                                              |           | High-risk group (n=133)                 |            |                                              |           |
|---------|-----------------------------------------|-----------|----------------------------------------------|-----------|-----------------------------------------|------------|----------------------------------------------|-----------|
|         | Experience with sexual health education |           | Intention to receive sexual health education |           | Experience with sexual health education |            | Intention to receive sexual health education |           |
|         | Yes                                     | No        | Yes                                          | No        | Yes                                     | No         | Yes                                          | no        |
| Age (y) |                                         |           |                                              |           |                                         |            |                                              |           |
| 60–64   | 7 (3.4)                                 | 8 (3.9)   | 11 (5.4)                                     | 5 (2.5)   | 0 (0.0)                                 | 1 (0.8)    | 0 (0.0)                                      | 0 (0.0)   |
| 65–70   | 22 (10.8)                               | 34 (16.7) | 35 (17.2)                                    | 20 (9.8)  | 1 (0.8)                                 | 20 (15.0)  | 17 (12.8)                                    | 5 (3.8)   |
| 71–80   | 29 (14.2)                               | 76 (37.3) | 44 (21.6)                                    | 61 (29.9) | 9 (6.8)                                 | 67 (50.4)  | 30 (22.6)                                    | 44 (33.1) |
| 81–90   | 2 (1.0)                                 | 22 (10.8) | 7 (3.4)                                      | 17 (8.3)  | 2 (1.5)                                 | 25 (18.8)  | 6 (4.5)                                      | 21 (15.8) |
| ≥91     | 0 (0.0)                                 | 4 (2.0)   | 0 (0.0)                                      | 4 (2.0)   | 0 (0.0)                                 | 3 (2.3)    | 2 (1.5)                                      | 1 (0.8)   |
| Sex     |                                         |           |                                              |           |                                         |            |                                              |           |
| Male    | 23 (11.3)                               | 74 (36.3) | 50 (24.5)                                    | 47 (23.0) | 12 (9.0)                                | 100 (75.2) | 48 (36.1)                                    | 62 (46.6) |
| Female  | 37 (18.1)                               | 70 (34.3) | 47 (23.0)                                    | 60 (29.4) | 0 (0.0)                                 | 16 (12.0)  | 7 (5.3)                                      | 9 (6.8)   |

Values are presented as number (%).
