# Supplementary material for: Sexual behavior and sexually transmitted infection in the elderly population of South Korea
Source: PubMed Central journal article supplement — Investig Clin Urol. 2019 Apr 1;60(3):202–9. doi: 10.4111/icu.2019.60.3.202 (PMC6495036; doi:10.4111/icu.2019.60.3.202), 2019-04-01
Supplement: icu-60-202-s014.pdf [file icu-60-202-s014.pdf]

**Supplementary Table 13.** Preferred institution to receive sexual health education for low-risk group and high-risk group

|         | Low-risk group (n=204) |                |                   |                       |                      |          | High-risk group (n=133) |                |                   |                       |                      |                           |         |
|---------|------------------------|----------------|-------------------|-----------------------|----------------------|----------|-------------------------|----------------|-------------------|-----------------------|----------------------|---------------------------|---------|
|         | District office        | Welfare center | Counseling center | Religious institution | Public health center | Etc.     | District office         | Welfare center | Counseling center | Religious institution | Public health center | Professional organization | Etc.    |
| Age (y) |                        |                |                   |                       |                      |          |                         |                |                   |                       |                      |                           |         |
| 60–64   | 1 (0.5)                | 10 (4.9)       | 0 (0.0)           | 0 (0.0)               | 3 (1.5)              | 0 (0.0)  | 0 (0.0)                 | 0 (0.0)        | 0 (0.0)           | 0 (0.0)               | 1 (0.8)              | 0 (0.0)                   | 0 (0.0) |
| 65–70   | 5 (2.5)                | 27 (13.2)      | 3 (1.5)           | 0 (0.0)               | 12 (5.9)             | 4 (2.0)  | 3 (2.3)                 | 2 (1.5)        | 1 (0.8)           | 1 (0.8)               | 15 (11.3)            | 0 (0.0)                   | 0 (0.0) |
| 71–80   | 0 (0.0)                | 38 (18.6)      | 4 (2.0)           | 0 (0.0)               | 20 (9.8)             | 8 (3.9)  | 6 (4.5)                 | 15 (11.3)      | 2 (1.5)           | 1 (0.8)               | 36 (27.1)            | 3 (2.3)                   | 7 (5.3) |
| 81–90   | 0 (0.0)                | 4 (2.0)        | 0 (0.0)           | 0 (0.0)               | 2 (1.0)              | 2 (1.0)  | 0 (0.0)                 | 3 (2.3)        | 1 (0.8)           | 0 (0.0)               | 16 (12.0)            | 0 (0.0)                   | 1 (0.8) |
| ≥91     | 0 (0.0)                | 0 (0.0)        | 0 (0.0)           | 0 (0.0)               | 0 (0.0)              | 1 (0.5)  | 0 (0.0)                 | 1 (0.8)        | 1 (0.8)           | 0 (0.0)               | 0 (0.0)              | 0 (0.0)                   | 0 (0.0) |
| Sex     |                        |                |                   |                       |                      |          |                         |                |                   |                       |                      |                           |         |
| Male    | 2 (1.0)                | 41 (20.1)      | 4 (2.0)           | 0 (0.0)               | 19 (9.3)             | 11 (5.4) | 7 (5.3)                 | 19 (14.3)      | 5 (3.8)           | 1 (0.8)               | 56 (42.1)            | 3 (2.3)                   | 8 (6.0) |
| Female  | 4 (2.0)                | 38 (18.6)      | 3 (1.5)           | 0 (0.0)               | 18 (8.8)             | 2 (1.0)  | 2 (1.5)                 | 2 (1.5)        | 0 (0.0)           | 0 (0.0)               | 12 (9.0)             | 0 (0.0)                   | 0 (0.0) |

Values are presented as number (%).
