# Supplementary material for: Sexual behavior and sexually transmitted infection in the elderly population of South Korea
Source: PubMed Central journal article supplement — Investig Clin Urol. 2019 Apr 1;60(3):202–9. doi: 10.4111/icu.2019.60.3.202 (PMC6495036; doi:10.4111/icu.2019.60.3.202), 2019-04-01
Supplement: icu-60-202-s015.pdf [file icu-60-202-s015.pdf]

**Supplementary Table 14.** Preferred person to receive sexual health education for low-risk group and high-risk group

|         | Low-risk group (n=204) |                      |         |         |         | High-risk group (n=133) |                      |         |         |         |
|---------|------------------------|----------------------|---------|---------|---------|-------------------------|----------------------|---------|---------|---------|
|         | Doctor/<br>nurse       | Counseling<br>center | Family  | Friend  | Etc.    | Doctor/<br>nurse        | Counseling<br>center | Family  | Friend  | Etc.    |
| Age (y) |                        |                      |         |         |         |                         |                      |         |         |         |
| 60–64   | 7 (3.4)                | 7 (3.4)              | 0 (0.0) | 1 (0.5) | 0 (0.0) | 1 (0.8)                 | 0 (0.0)              | 0 (0.0) | 0 (0.0) | 0 (0.0) |
| 65–70   | 21 (10.3)              | 24 (11.8)            | 0 (0.0) | 1 (0.5) | 1 (0.5) | 14 (10.5)               | 7 (5.3)              | 0 (0.0) | 0 (0.0) | 0 (0.0) |
| 71–80   | 39 (19.1)              | 32 (15.7)            | 1 (0.5) | 1 (0.5) | 4 (2.0) | 40 (30.1)               | 22 (16.5)            | 0 (0.0) | 2 (1.5) | 6 (4.5) |
| 81–90   | 5 (2.5)                | 6 (2.9)              | 0 (0.0) | 0 (0.0) | 2 (1.0) | 17 (12.8)               | 5 (3.8)              | 0 (0.0) | 2 (1.5) | 1 (0.8) |
| ≥91     | 0 (0.0)                | 0 (0.0)              | 0 (0.0) | 0 (0.0) | 1 (0.5) | 1 (0.8)                 | 1 (0.8)              | 0 (0.0) | 0 (0.0) | 0 (0.0) |
| Sex     |                        |                      |         |         |         |                         |                      |         |         |         |
| Male    | 38 (18.6)              | 35 (17.2)            | 1 (0.5) | 2 (1.0) | 4 (2.0) | 63 (47.4)               | 29 (21.8)            | 0 (0.0) | 4 (3.0) | 7 (5.3) |
| Female  | 34 (16.7)              | 34 (16.7)            | 0 (0)   | 1 (0.5) | 4 (2.0) | 10 (7.5)                | 6 (4.5)              | 0 (0.0) | 0 (0.0) | 0 (0.0) |

Values are presented as number (%).
